# Supplementary material
Source: MDPI journal article supplement (https://www.mdpi.com/2072-4292/9/9/900)
Supplement: s1 [file s1]

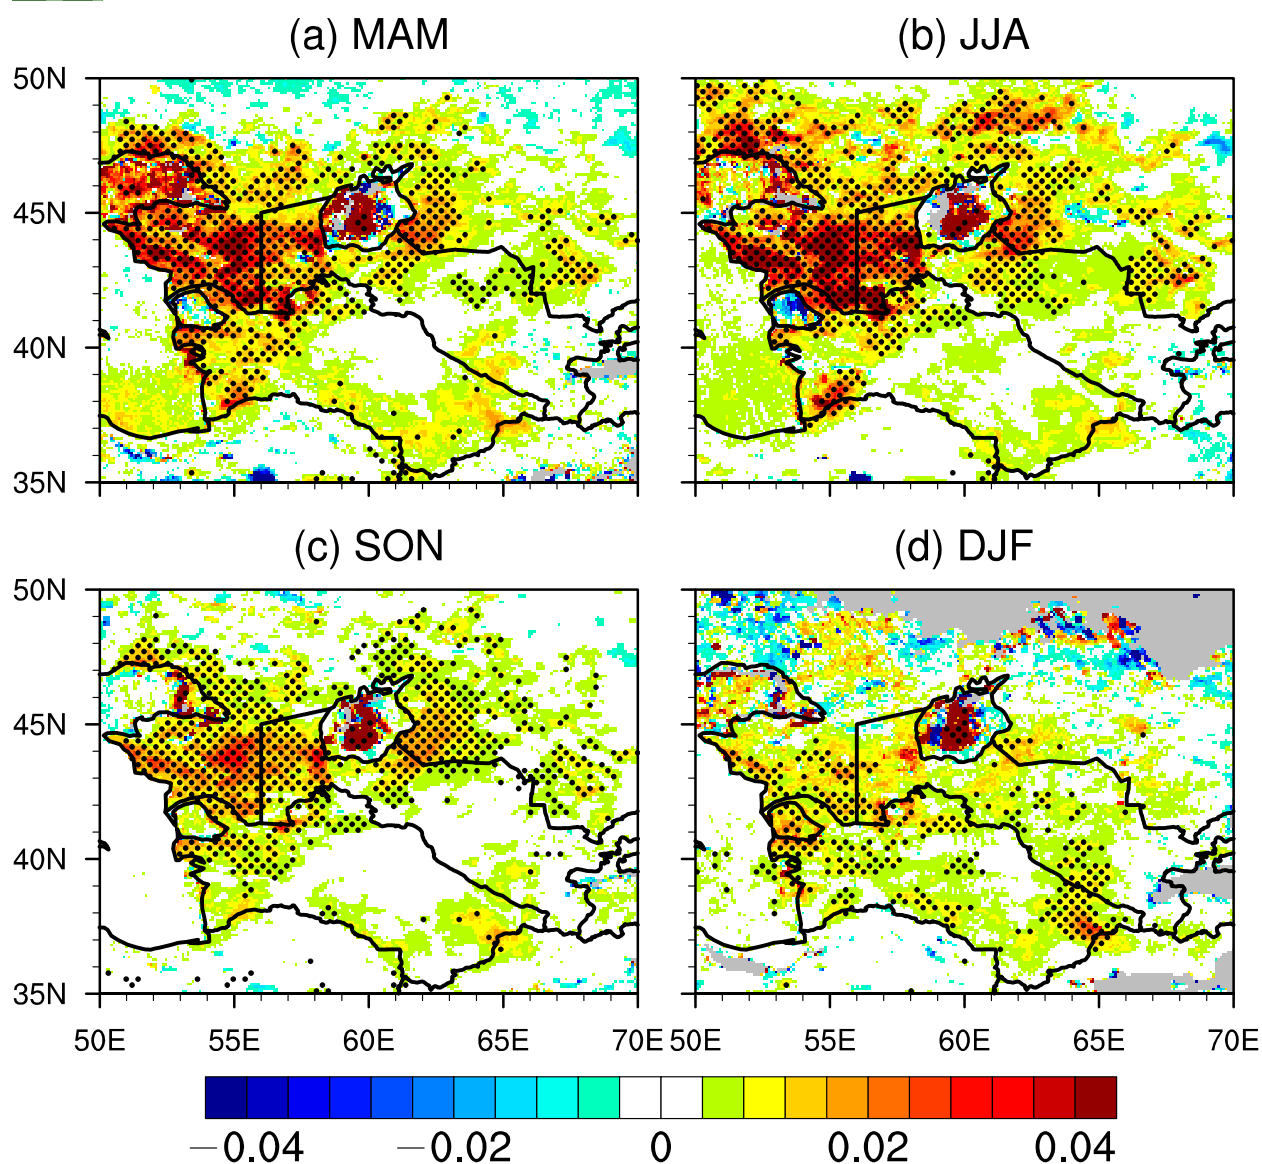

**Figure 1.** Seasonal trends of AOD (AOD year<sup>-1</sup>) for (a) spring, (b) summer, (c) fall, and (d) winter from 2003 to 2015. Dots represent the grids that are confident at 95% level. Gray colors in missing values.

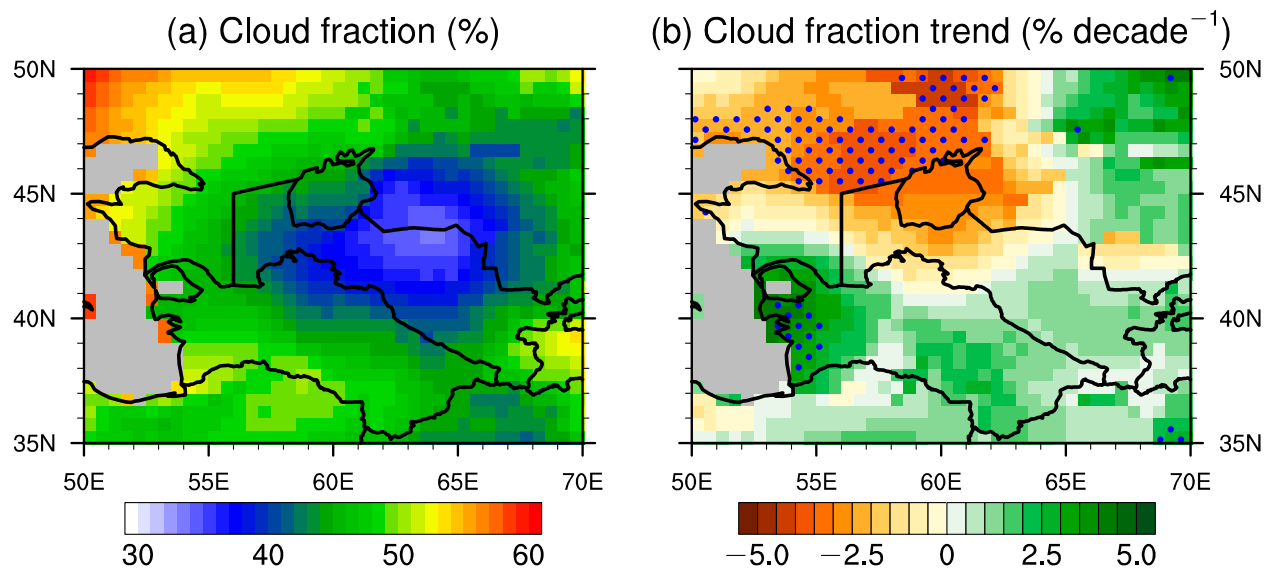

**Figure 2.** Spatial patterns of (a) cloud fraction (%) climatology and (b) yearly linear trends of cloud fraction (% decade) from 2003 to 2015. CRU data was used. Dots represent the grids that are confident at 95% level. Gray colors in missing values.
